# Supplementary material for: Multiscale Modelling of Milk Proteins Adsorption on Metallic Iron Surfaces
Source: Preprints.org preprint supplement (doi:10.20944/preprints202305.1711.v1), 2023-05-24
Supplement: Supplementary file 1 [file supplementary]

## Sheet: Sheet 1 - output-fe110
	Table 2) Description of 820 milk proteins interaction with Fe (100, 110, 111) based on the lowest energy values of the adsorption heatmaps.
	Fe-100				Fe-110				Fe-111
Milk Protein ID	phi	theta	min-energy (KT)	min-dist (nm)	phi	theta	min-energy (KT)	min-dist (nm)	phi	theta	min-energy (KT)	min-dist (nm)
E1BMX0	230	110	-210.663	0.10301	60	25	-215.843	0.13466	230	110	-213.959	0.08445
A6QQQ9	190	90	-357.904	0.11888	190	90	-367.625	0.091	190	90	-362.455	0.1072
Q28133	105	60	-225.877	0.18193	240	130	-214.263	0.1306	240	130	-221.725	0.13286
Q0IIA2	240	135	-231.011	0.17613	240	135	-222.481	0.16732	45	130	-241.075	0.05168
G3X8C8	300	50	-277.663	0.0067	35	150	-281.549	0.11564	195	160	-270.306	0.03889
F1MMI6	250	120	-421.028	0.11647	250	120	-410.595	0.10583	250	120	-425.74	0.10678
Q2KJ32	330	110	-321.268	0.15802	330	110	-322.934	0.1417	330	110	-322.525	0.14472
F1MH40	185	145	-241.159	0.09225	185	145	-260.118	0.06813	185	145	-232.221	0.08238
Q0P569	170	155	-335.237	0.0399	170	155	-325.17	0.03302	170	155	-328.724	0.03412
E1BEV7	65	60	-346.14	0.07204	65	60	-339.358	0.09928	65	60	-328.003	0.08681
Q1JPB0	95	120	-269.477	0.047	65	55	-267.942	0.02559	70	55	-261.802	0.01489
Q2TBX4	355	50	-264.555	0.14289	355	50	-263.015	0.12206	355	25	-262.035	0.16607
E1BF81	105	135	-239.944	0.05317	105	135	-249.074	0.04009	100	135	-238.501	0.06112
P61223	305	70	-249.338	0.03902	40	20	-226.241	0.10194	40	20	-232.798	0.09574
Q3SYR8	115	135	-166.753	0.17166	320	20	-162.617	0.15182	115	135	-170.282	0.1668
P62935	305	150	-199.863	0.18285	190	75	-187.967	0.17478	40	20	-199.04	0.00764
G3X7D2	155	65	-324.523	0.0559	155	65	-295.922	0.03746	155	65	-315.741	0.03966
Q2TBL2	40	25	-223.603	0.00254	40	25	-236.605	0.00174	40	25	-215.252	0.01104
Q3SZR3	190	105	-223.298	0.12549	195	105	-216.751	0.13992	190	105	-208.215	0.11057
P84081	15	110	-218.833	0.03859	85	35	-215.91	0.1538	15	110	-210.746	0.0366
F6QLM5	5	90	-232.551	0.1465	5	90	-247.444	0.13897	5	90	-229.792	0.14469
F1MUP9	330	115	-294.932	0.03458	335	115	-274.477	0.14166	335	120	-265.563	0.1487
A5PKC2	75	35	-248.788	0.0008	170	65	-223.866	0.00975	50	45	-241.077	0.06265
F1ML02	155	70	-191.741	0.02565	155	70	-201.292	0.01611	155	70	-186.813	0.0351
F1MMV6	170	45	-265.712	0.03177	150	35	-252.241	0.10271	150	35	-255.678	0.09601
Q2KIS7	155	105	-208.223	0.11145	155	105	-236.833	0.09534	150	105	-217.527	0.09971
Q29451	170	115	-346.996	0.10849	170	115	-366.83	0.10989	170	115	-358.349	0.11307
F1N7D7	110	70	-370.346	0.00605	255	45	-353.473	0.064	110	70	-341.31	0.014
Q29S21	25	30	-271.852	0.00153	195	100	-266.586	0.07192	195	100	-257.72	0.07384
P50448	5	45	-209.109	0.10522	75	155	-206.042	0.07947	10	50	-201.722	0.15848
F1MJV6	230	120	-272.372	0.02874	30	100	-268.961	0.01208	30	100	-277.927	0.02471
Q8WML4	325	95	-172.229	0.037	325	95	-172.006	0.03538	70	100	-188.762	0.06284
A6QPT4	260	30	-274.832	0.06917	260	30	-271.071	0.05268	260	30	-273.851	0.07045
Q2HJ81	210	95	-331.456	0.15839	210	95	-316.629	0.15582	210	95	-337.093	0.14246
Q1RMN9	165	80	-274.19	0.13833	355	125	-278.288	0.05189	165	75	-290.912	0.12558
Q2HJ49	295	100	-356.703	0.08452	300	100	-327.719	0.06745	295	100	-353.637	0.07494
P19803	40	105	-254.981	0.16148	40	105	-256.386	0.14686	40	105	-235.371	0.14735
P80195	130	70	-203.404	0.17414	135	75	-202.956	0.03464	135	75	-201.761	0.03434
E1BNK3	90	60	-266.423	0.15157	90	60	-251.341	0.15188	90	60	-259.542	0.14744
Q2TBU0	260	35	-229.452	0.10326	260	35	-219.376	0.08574	260	35	-206.417	0.09748
Q3T074	335	120	-261.737	0.10665	335	120	-242.779	0.10479	205	100	-244.045	0.04672
G5E5P3	290	120	-292.377	0.11818	290	120	-292.256	0.11246	290	120	-291.398	0.12635
Q2TA49	235	125	-331.833	0.01718	235	125	-285.537	0.01098	235	125	-299.47	0.01428
P02584	210	115	-171.428	0.15964	35	100	-176.098	0.14937	35	100	-174.947	0.15949
Q5E956	230	155	-228.976	0.17646	225	155	-220.858	0.13234	230	155	-226.494	0.16848
F1N152	35	25	-299.106	0.13332	35	25	-277.897	0.12812	35	25	-286.553	0.13512
A7YWM2	255	90	-295.966	0.01572	255	90	-316.637	0.01342	260	85	-301.455	0.06455
Q3SYU6	300	30	-321.238	0.06947	300	30	-302.084	0.05859	305	30	-310.245	0.10482
F1MYJ3	290	40	-301.295	0.06923	290	40	-305.733	0.06767	290	40	-300.206	0.06834
Q95LA9	30	125	-251.963	0.02581	30	125	-261.147	0.02575	150	80	-268.844	0.08556
Q3SX32	125	85	-213.473	0.10873	125	90	-223.383	0.061	125	90	-231.498	0.07488
Q17QC7	225	60	-213.053	0.05736	225	60	-206.327	0.04562	225	60	-194.93	0.05152
Q3SX14	80	75	-278.705	0.13118	80	75	-281.105	0.10913	80	75	-265.605	0.11928
P81187	240	65	-311.013	0.04369	15	60	-293.176	0.01651	15	60	-294.166	0.02437
Q5E947	110	90	-233.612	0.01679	110	85	-223.016	0.08308	110	85	-216.017	0.08027
P08166	210	80	-227.119	0.16157	210	80	-222.826	0.155	210	80	-238.531	0.15243
A5PK77	115	125	-306.001	0.04452	115	125	-283.919	0.05021	115	125	-287.53	0.03205
F1MSZ6	200	60	-256.487	0.16013	310	90	-243.882	0.11885	200	60	-252.159	0.15659
F1MUX5	80	120	-277.337	0.09699	80	120	-284.872	0.098	80	120	-267.99	0.08797
P00711	5	90	-197.582	0.17567	5	90	-183.766	0.16392	5	90	-197.653	0.15319
Q3T052	140	55	-316.415	0.06699	140	55	-284.17	0.05987	140	55	-299.709	0.05865
E1BM57	185	105	-292.782	0.03272	190	105	-276.13	0.135	185	105	-278.872	0.0303
P01131	130	130	-274.315	0.00633	130	130	-265.685	0.0022	130	130	-257.315	0.0063
A7MB70	205	160	-318.334	0.07868	210	160	-297.658	0.09173	210	160	-301.044	0.09687
Q2KHU0	210	95	-323.514	0.04522	210	95	-301.935	0.0392	210	95	-316.269	0.03516
A5D7V3	45	40	-202.215	0.16099	45	40	-212.602	0.12815	45	40	-203.536	0.15023
Q2TBX9	95	70	-250.066	0.00199	20	120	-255.662	0.09118	20	120	-265.758	0.10782
F1MRQ8	215	115	-290.595	0.15059	215	115	-286.571	0.14173	220	115	-285.447	0.14114
Q148H6	350	45	-206.957	0.00557	345	45	-204.523	0.00138	345	45	-207.873	0.00881
P62992	110	165	-276.256	0.00465	110	165	-255.398	0.00095	60	165	-247.08	0.14968
Q58DS9	275	70	-196.822	0.15487	275	70	-183.655	0.14365	275	70	-203.801	0.13261
Q29RU4	65	50	-322.796	9e-05	65	55	-330.912	0.00021	65	70	-333.246	0.02043
F1ML13	170	150	-274.573	0.0122	320	90	-251.929	0.10185	170	150	-266.72	0.00963
Q1ZYR0	180	105	-319.567	0.07491	180	105	-292.169	0.06592	180	105	-308.12	0.05856
Q2KJD0	235	10	-295.537	0.12524	240	10	-283.049	0.1306	240	10	-293.252	0.11742
P68265	205	50	-277.505	0.06204	205	50	-256.115	0.05623	205	50	-256.97	0.06241
F1MFJ3	85	70	-237.017	0.02434	85	70	-222.522	0.01856	85	70	-226.933	0.03192
A2I7N2	115	120	-251.211	0.03948	115	120	-254.501	0.03727	120	125	-242.072	0.05213
Q9BGI3	130	45	-226.642	0.04082	130	45	-212.373	0.04819	40	125	-202.385	0.0492
F1MFI4	15	125	-293.138	0.03565	15	125	-285.77	0.04727	15	120	-272.429	0.01514
P17453	270	115	-319.066	0.04749	270	115	-327.917	0.04064	270	115	-327.171	0.04528
F1MGS9	270	135	-284.827	0.04137	270	135	-273.565	0.05776	270	135	-285.956	0.04412
Q3SZV7	170	135	-280.213	0.01722	315	130	-261.594	0.06761	315	130	-250.37	0.07666
F1MZJ5	125	130	-309.137	0.02085	280	110	-293.902	0.10561	280	110	-292.349	0.10665
Q9TTE1	115	125	-282.243	0.0799	115	125	-275.12	0.08228	120	125	-251.9	0.09623
F1N1I6	300	120	-317.647	0.09497	265	75	-302.386	0.03165	300	120	-301.629	0.08271
P00570	260	75	-245.311	0.07005	260	75	-252.959	0.05064	260	75	-251.059	0.0592
G3X6K8	125	150	-256.087	0.03425	120	150	-231.219	0.05825	125	150	-237.803	0.03458
A2VE47	290	145	-281.556	0.12873	290	145	-273.981	0.12561	280	140	-281.279	0.13907
P79121	325	125	-230.969	0.06482	325	125	-212.188	0.0499	105	140	-223.835	0.11295
A6QP39	30	80	-283.858	0.01991	30	80	-288.659	0.01605	30	80	-271.479	0.02088
P46446	335	15	-242.5	0.0777	75	135	-236.66	0.12628	335	15	-224.098	0.06684
P02769	135	105	-270.049	0.05776	140	105	-269.485	0.09237	140	105	-257.735	0.10898
P33097	160	135	-319.169	0.09262	160	135	-316.266	0.08776	160	135	-298.631	0.10357
Q1JPE3	245	60	-303.66	0.03688	250	60	-277.624	0.13316	245	60	-304.55	0.03608
Q58D62	290	85	-273.823	0.08283	65	55	-270.274	0.04119	290	85	-268.709	0.06455
Q2HJD5	25	155	-249.162	0.06265	25	155	-237.652	0.04981	25	155	-250.52	0.05684
Q58DL9	85	175	-332.343	0.01504	85	175	-322.352	0.00098	85	175	-303.474	0.00823
G3MXM5	75	115	-273.52	0.07403	75	115	-249.428	0.07889	75	115	-255.028	0.06308
Q28115	175	85	-259.103	0.0662	175	85	-249.382	0.06999	175	85	-242.141	0.06941
A6QR11	0	0	-0.00205	2	0	0	-0.00205	2	0	0	-0.00205	2
P19660	25	85	-392.9	0.00122	25	85	-322.114	0.00156	25	85	-352.584	0.00303
Q3SZA6	0	55	-245.575	0.14757	0	55	-249.227	0.13754	0	55	-239.538	0.14417
Q05443	240	100	-300.638	0.12372	240	100	-310.187	0.11919	240	100	-295.033	0.12191
Q3MI05	60	125	-274.087	0.06849	60	125	-258.236	0.05577	60	125	-263.386	0.04963
Q0IIG8	320	75	-203.247	0.02896	320	75	-183.98	0.02358	30	60	-201.759	0.14958
P79345	185	70	-253.378	0.17882	185	70	-229.166	0.17157	185	70	-227.236	0.17105
G3N0Q8	35	150	-238.837	0.05914	35	150	-234.819	0.04972	35	150	-245.172	0.04822
G3MYM8	110	100	-371.104	0.00437	110	100	-341	0.00541	110	100	-349.805	0.00679
Q32PH8	150	20	-312.578	0.03079	125	100	-280.692	0.07005	150	20	-315.046	0.02825
G3X6Q8	80	125	-293.671	0.01718	80	125	-289.679	0.00645	80	125	-290.475	0.01544
F1MCX1	115	165	-384.433	0.07577	110	165	-381.677	0.04859	115	165	-398.936	0.06638
F1MKS3	50	65	-287.559	0	50	65	-284.975	0.00031	50	70	-284.748	0.01722
P02070	220	120	-222.922	0.01874	45	60	-220.118	0.14692	220	120	-211.326	0.01217
A0JNP2	80	70	-201.13	0.17466	80	70	-189.831	0.17557	80	70	-194.344	0.16762
A7E350	0	0	-0.00205	2	0	0	-0.00205	2	0	0	-0.00205	2
E1BFD0	330	60	-258.488	0.07051	330	60	-254.572	0.06103	325	65	-250.77	0.14402
P00741	270	140	-253.335	0.17359	270	140	-244.959	0.16185	270	140	-244.504	0.16099
Q58D84	155	125	-241.617	0.01902	200	95	-222.688	0.09424	200	95	-238.035	0.12151
E1BNR9	220	100	-383.569	0.1095	220	100	-356.489	0.10503	220	100	-380.881	0.11375
P10790	250	25	-217.411	0.18004	250	25	-218.323	0.16423	255	25	-207.071	0.14555
Q2LGB5	165	10	-205.063	0.00187	170	10	-192.878	0.00615	145	85	-193.259	0.17441
A6QLB7	160	145	-355.176	0.19071	160	145	-305.549	0.18429	160	145	-312.496	0.18625
F1MBN4	340	90	-381.758	0.07406	340	90	-366.628	0.08415	340	90	-364.758	0.09051
Q28085	275	105	-232.561	0.00076	275	105	-221.77	0.00306	275	105	-220.134	0.01018
Q3SYR0	285	95	-260.915	0.15475	285	95	-282.391	0.12381	285	95	-253.762	0.15035
G3MWH1	260	80	-158.459	0.01104	85	85	-161.128	0.02917	260	80	-162.014	0.01278
Q0IIH7	100	90	-313.855	0.08286	100	90	-311.957	0.06761	100	90	-313.18	0.06452
A7YY28	115	110	-254.151	0.02318	115	110	-263.135	0.01608	115	110	-260.053	0.03027
P0CB32	335	130	-318.987	0.06583	335	130	-312.21	0.0573	335	130	-311.875	0.05183
Q0VCU1	130	105	-321.842	0.0651	130	105	-314.324	0.04908	130	105	-300.555	0.04804
F1MNV5	350	70	-238.66	0.10054	350	75	-243.133	0.12586	350	70	-263.163	0.09451
F1N3A1	25	20	-344.433	0.08415	25	10	-338.744	0.04819	25	20	-339.434	0.08103
Q3T083	160	160	-220.475	0.00501	325	65	-210.742	0.03571	325	70	-215.115	0.10996
Q17QK3	80	140	-316.608	0.04718	80	140	-303.149	0.0363	75	145	-299.309	0.07583
Q29RI6	185	70	-316.489	0.07235	185	70	-304.627	0.05363	185	70	-300.094	0.06281
F1MIH9	50	85	-329.744	0.09714	50	85	-314.596	0.08286	50	85	-322.922	0.0891
F1MZ96	185	145	-230.264	0.06033	185	145	-248.208	0.04262	185	145	-227.026	0.05678
Q9GKR3	345	95	-310.603	0.0344	345	95	-299.511	0.03737	350	95	-282.008	0.01388
F1MUP1	250	75	-333.859	0.02624	250	75	-322.477	0.02865	250	75	-318.046	0.03058
F1MWX3	195	65	-273.604	0.11145	130	105	-268.753	0.07201	15	0	-267.499	0.06904
A8YXZ2	125	95	-334.746	0.06684	125	95	-288.446	0.06736	125	100	-307.199	0.04798
P06868	315	40	-352.785	0.12515	315	40	-358.24	0.11858	315	40	-340.665	0.12641
O18738	75	70	-380.365	0.03119	250	40	-354.316	0.06479	75	70	-360.477	0.03883
Q3ZC09	130	130	-338.249	0.13766	130	130	-339.392	0.13209	130	135	-338.933	0.05342
Q3ZCL0	100	45	-238.4	0.09323	105	165	-228.686	0.10075	100	45	-229.825	0.09372
Q08DU4	5	160	-260.162	0.13151	5	160	-229.739	0.12607	5	160	-257.556	0.11561
E1BJH7	125	150	-264.219	0.10619	125	150	-258.794	0.10424	125	150	-251.923	0.12564
A4FUZ0	245	65	-277.26	0.11714	245	65	-272.039	0.09876	245	65	-283.517	0.10861
F1MX50	25	165	-235.997	0.19325	330	100	-222.545	0.18716	25	165	-242.446	0.18426
P31976	175	70	-315.555	0.07443	175	70	-310.094	0.0765	300	100	-310.174	0.07595
Q3ZCK3	180	130	-219.674	0.02581	180	130	-216.775	0.04666	190	130	-222.421	0.05094
E1B6Z6	255	125	-200.509	0.07926	255	130	-196.121	0.14139	345	100	-186.694	0.13038
F1N6Y1	65	140	-295.309	0.11482	75	145	-298.128	0.06024	65	140	-300.696	0.1073
Q865V6	40	140	-291.273	0.06378	40	140	-265.368	0.07525	40	140	-271.31	0.06574
Q3MHN2	155	140	-308.592	0.07822	150	140	-301.369	0.05455	155	140	-316.017	0.06926
Q3MHM5	205	95	-275.682	0.13974	205	95	-270.829	0.1391	205	95	-288.909	0.12326
Q58DP6	295	85	-296.593	0.03596	295	85	-264.423	0.04055	300	85	-283.033	0.04464
G3N0T0	270	110	-292.958	0.14454	270	110	-276.62	0.14377	270	110	-264.49	0.13439
A5D7K0	195	40	-221.187	0.1475	220	45	-226.533	0.16934	220	45	-231.37	0.17239
F2Z4D5	315	60	-190.328	0.122	315	65	-206.994	0.08858	145	95	-186.342	0.10146
P17690	165	55	-309.113	0.0425	175	50	-287.876	0.00119	165	55	-283.568	0.06024
F1N1Z6	55	0	-354.558	0.07452	55	0	-372.708	0.07121	50	0	-328.345	0.06326
A6QLS9	225	170	-226.433	0.1882	230	170	-211.849	0.17683	225	170	-223.789	0.16876
G3N3D4	145	80	-364.491	0.08311	145	80	-333.697	0.0876	145	80	-359.637	0.08134
A6QNZ7	80	55	-276.691	0.00404	80	55	-273.579	0.00187	80	55	-271.159	0.00584
F1MY58	180	60	-291.757	0.04669	180	60	-291.764	0.05574	180	60	-309.853	0.06489
Q17QB3	205	140	-308.666	0.04428	210	145	-289.992	0.15026	210	145	-305.235	0.14093
A4IFG0	80	120	-242.749	0.11482	80	120	-251.14	0.11142	85	120	-241.221	0.08146
F1MMD7	120	135	-281.47	0.11295	120	135	-263.755	0.11705	120	135	-292.015	0.09338
F1N3H1	55	50	-253.311	0.12356	220	120	-243.366	0.034	180	20	-241.866	0.12806
P98140	125	125	-255.846	0.10142	130	130	-253.375	0.00073	125	125	-261.717	0.09708
Q0P5D6	220	75	-272.527	0.0636	220	75	-266.061	0.04908	220	75	-259.927	0.05137
Q9XSG3	270	45	-298.128	0.06498	270	45	-289.656	0.0558	270	45	-285.76	0.05293
P50291	210	160	-256.46	0.02657	215	160	-269.638	0.00498	50	55	-251.21	0.05911
A6QR19	65	10	-329.703	0.12115	70	10	-357.402	0.10543	55	5	-340.111	0.11347
Q3ZBZ8	40	90	-384.693	0.05357	40	90	-366.452	0.04935	40	95	-371.815	0.02608
F1MLW7	220	30	-212.922	0.15919	240	30	-218.55	0.10944	220	30	-208.226	0.15273
F1MM13	130	90	-339.26	0.06339	130	90	-335.395	0.06119	130	90	-346.826	0.06226
E1BEL7	220	145	-281.456	0.05565	220	145	-237.803	0.05278	220	145	-255.579	0.05024
G3X8B1	0	170	-205.653	0.04905	35	160	-188.984	0.18765	0	170	-200.076	0.03449
F1MI18	25	110	-285.624	0.01373	240	80	-286.482	0.0396	240	80	-276.355	0.04522
G5E589	80	130	-279.994	0.05394	70	130	-262.91	0.14579	80	130	-276.719	0.04856
Q5E9F5	85	100	-256.114	0.1727	85	100	-234.798	0.17178	85	100	-250.602	0.16756
A6QPW6	260	75	-297.058	0.0532	260	75	-284.157	0.05742	260	75	-282.284	0.0392
E1BH94	305	70	-304.758	0.03415	305	70	-288.963	0.03088	305	70	-288.45	0.03755
E1BIY5	85	80	-254.16	0.01358	85	80	-238.052	0.0192	90	105	-241.345	0.10427
F1MYX5	170	105	-274.763	0.07167	170	105	-263.524	0.06464	170	105	-272.36	0.07739
Q0VCM5	300	15	-267.432	0.11375	305	15	-266.948	0.10072	305	15	-270.938	0.11066
G3N342	80	35	-259.193	0.05045	80	35	-254.298	0.05382	80	35	-249.353	0.05571
P02672	315	135	-259.701	0.01908	335	130	-261.035	0.10112	335	130	-245.719	0.10601
F1N4Y5	40	60	-283.006	0.14619	45	55	-286.177	0.13258	35	60	-285.496	0.16429
G3MYW7	185	135	-242.309	0.10161	185	135	-262.86	0.08663	190	135	-246.192	0.10378
P28800	80	70	-281.68	0.14341	80	70	-262.882	0.14744	80	70	-278.378	0.13751
Q28178	285	25	-296.589	0.00095	330	160	-284.174	0.06079	280	30	-266.045	0.04519
G3N0S9	230	95	-325.332	0.04801	230	95	-320.3	0.04412	230	95	-323.548	0.05339
G3X7W8	215	35	-266.561	0.09286	215	35	-265.792	0.07366	215	35	-272.104	0.06553
A6QP36	355	70	-262.629	0.05027	325	40	-251.663	0.13702	5	75	-251.194	0.05125
G3MXK8	230	90	-253.208	0.13167	230	90	-246.842	0.11751	230	90	-249.427	0.11873
Q3T0P6	155	80	-238.779	0.14307	160	80	-235.203	0.12766	165	85	-231.863	0.14329
A3KN30	345	40	-295.523	0.07565	345	40	-308.201	0.05348	345	40	-302.41	0.07131
P17248	335	40	-299.063	0.15206	335	40	-295.336	0.14775	335	40	-291.526	0.15157
F1N3M3	65	70	-157.741	0.00061	65	70	-158.546	0	70	75	-148.561	0.02345
P00735	275	55	-308.275	0.02942	275	55	-300.402	0.07586	270	55	-298.757	0.07987
Q2KIG3	210	70	-312.946	0.0599	210	70	-290.268	0.06174	205	70	-292.983	0.01917
Q3SYS6	140	165	-246.36	0.16316	140	165	-232.568	0.14166	170	155	-231.588	0.16619
Q3SZ18	265	115	-297.995	0.14277	265	115	-290.547	0.1472	265	115	-288.261	0.14007
G3N081	100	30	-211.669	0.1668	100	30	-206.279	0.15243	100	30	-213.463	0.15212
G3MXB5	150	55	-216.217	0.13665	155	70	-213.168	0.02477	150	55	-212.996	0.12928
G5E6M1	125	135	-278.744	0.1305	200	75	-270.382	0.01798	200	75	-279.301	0.02568
F1MGK8	180	105	-253.481	0.06837	180	105	-239.874	0.06314	180	105	-238.928	0.06418
G5E513	80	125	-284.339	0.04758	80	125	-278.855	0.05082	80	135	-282.137	0.11937
F1N726	5	70	-219.04	0.03229	335	10	-226.769	0.0503	5	70	-216.717	0.03672
Q3ZCJ8	245	140	-340.649	0.02792	245	135	-324.959	0.00407	105	85	-338.566	0.0581
Q2HJH2	205	120	-237.82	0.1457	205	120	-217.779	0.1405	205	120	-215.136	0.14059
F1MZ63	85	105	-291.14	0.00563	85	105	-288.083	0.00602	80	120	-286.68	0.07938
P16368	95	140	-193.366	0.17811	285	85	-196.096	0.12427	285	85	-187.003	0.14056
F1MEA1	140	25	-313.824	0.04645	155	25	-337.044	0.0385	140	25	-322.119	0.04431
O18836	170	40	-226.866	0.04941	250	75	-222.5	0.08806	250	75	-228.679	0.08702
E1BD63	350	110	-242.924	0.06822	350	125	-247.286	0.0536	260	75	-239.858	0.01232
Q3MHN5	35	65	-297.701	0.02217	85	60	-293.021	0.06648	35	65	-288.423	0.01416
Q17QL7	290	55	-294.786	0.03113	70	75	-301.429	0.01049	290	55	-310.568	0.02807
Q56JW4	75	45	-215.87	0.03198	70	45	-207.048	0.00049	80	30	-219.31	0.17019
E1BIX9	215	150	-302.62	0.09503	215	150	-312.17	0.09546	215	150	-305.419	0.10668
G3N2K4	305	95	-311.748	0.13729	35	105	-305.806	0.14283	305	95	-301.811	0.12946
Q05717	275	140	-280.216	0.18059	125	150	-268.096	0.05119	275	140	-286.707	0.1782
Q95M12	330	30	-339.464	0.13448	330	30	-324.479	0.12121	330	30	-323.996	0.12995
E1BLA8	190	90	-352.028	0.06837	190	90	-348.19	0.05577	190	90	-345.983	0.06761
Q9MYM4	240	70	-315.273	0.10723	240	75	-313.51	0.10723	240	70	-310.56	0.10042
E1BKZ1	220	100	-291.511	0.06085	220	100	-267.065	0.04486	220	100	-272.514	0.05926
Q2TBX6	210	155	-271.812	0.00373	210	155	-275.94	0.00135	210	165	-270.174	0.15435
G5E5C9	135	90	-257.866	0.04975	135	90	-246.826	0.04743	135	90	-232.655	0.04275
F1ML49	290	85	-371.328	0.08763	290	85	-361.226	0.0995	290	85	-359.315	0.06862
G5E604	180	90	-213.213	0.05213	200	165	-224.714	0.07962	195	160	-213.097	0.15276
G3MYZ3	265	100	-237.549	0.04571	135	105	-236.73	0.01153	140	105	-250.013	0.11344
Q08E11	45	105	-249.944	0.16689	45	105	-228.068	0.1668	30	115	-223.048	0.1856
P12763	235	130	-255.238	0.15653	235	130	-249.312	0.14968	235	130	-237.634	0.15243
F1MSB7	175	95	-280.854	0.04556	175	95	-271.353	0.04755	175	95	-273.065	0.05238
F1N431	50	20	-334.958	0.14231	50	20	-325.33	0.13001	50	20	-338.771	0.1291
Q03247	345	80	-234.591	0.18912	345	80	-230.742	0.18157	345	80	-245.494	0.18704
P08728	180	110	-327.691	0.07586	180	110	-362.728	0.06216	180	110	-342.551	0.0651
P25326	15	20	-257.729	0.02718	310	135	-229.945	0.15579	30	15	-250.712	0.07449
P49259	310	105	-412.652	0.0895	310	105	-407.95	0.08369	310	105	-395.876	0.08632
F1N0R8	130	135	-324.803	0.01085	130	135	-268.265	0.0066	130	135	-275.955	0.00832
F1N2J8	25	90	-310.073	0.01975	15	80	-302.183	0.01287	35	95	-296.973	0.04834
A5PK69	35	115	-302.879	0.02935	35	110	-269.192	0.12528	35	110	-285.794	0.12295
Q6B856	155	45	-256.608	0.05767	90	5	-248.392	0.03929	250	10	-243.395	0.12705
F1MDS0	45	80	-192.273	0.0725	45	80	-173.087	0.06482	45	80	-179.361	0.06485
A2I7N0	230	125	-239.366	0.09873	230	50	-247.178	0.10366	230	125	-250.458	0.10048
E1BJ49	285	75	-290.32	0.0244	285	75	-276.526	0.01569	285	75	-279.61	0.04498
G5E5H2	90	170	-240.593	0.07011	90	170	-236.406	0.05357	90	170	-232.749	0.06106
Q9GLE5	215	160	-267.589	0.07574	205	160	-264.238	0.14961	205	160	-258.517	0.15539
P46193	190	60	-246.235	0.17502	190	60	-278.92	0.15689	185	60	-242.004	0.13641
F1MGN0	240	170	-336.661	0.16493	240	170	-316.027	0.15934	225	150	-331.997	0.13375
F1MEW1	25	60	-304.119	0.07391	25	60	-280.717	0.07222	25	60	-301.872	0.06161
A5D7J6	30	140	-263.236	0.04183	30	140	-265.648	0.04348	30	140	-247.924	0.05088
G3MXH2	115	95	-270.195	0.1783	115	95	-263.082	0.17071	115	95	-260.46	0.17649
P18892	170	60	-287.622	0.08721	170	60	-280.609	0.08036	170	60	-269.803	0.08393
E1B9M9	145	65	-195.939	0.1757	140	65	-194.265	0.16558	135	40	-207.237	0.17377
A6QR46	280	110	-194.613	0.08216	90	140	-197.19	0.13436	90	140	-202.27	0.13087
F1MS00	70	75	-204.143	0.03379	70	75	-199.444	0.03434	70	75	-204.946	0.02483
Q28034	155	35	-306.952	0.00615	155	35	-306.72	0.00128	155	35	-303.03	0.00926
G8JKW7	110	120	-225.968	0.05678	115	120	-228.868	0.05837	115	120	-224.804	0.05911
E1BBY7	335	120	-424.251	0.05638	335	120	-419.345	0.06238	335	120	-425.328	0.07079
A5D7A0	15	125	-243.298	0.16839	15	125	-253.488	0.14726	295	40	-246.551	0.10017
G5E5T5	125	25	-241.891	0.01764	125	25	-246.569	0.0163	125	25	-262.638	0.02345
F1MME1	250	75	-345.761	0.09476	250	75	-328.185	0.08999	250	75	-338.007	0.09824
E1BGX8	125	135	-361.457	0.04027	125	135	-330.062	0.03853	125	135	-329.571	0.03706
P01045	155	135	-229.809	0.0965	150	135	-224.123	0.07118	200	105	-229.181	0.02966
Q3SYW2	205	85	-277.788	0.03853	205	85	-270.093	0.0336	235	40	-254.863	0.05314
E1BKS1	315	130	-265.117	0.02306	275	100	-231.654	0.18044	315	130	-232.604	0.01614
P42916	330	65	-310.098	0.01116	325	55	-300.982	0.05461	330	60	-283.373	0.07424
E1BAB5	5	100	-339.038	0.00248	150	100	-324.253	0.05504	150	100	-324.477	0.07391
G3MXC4	290	75	-160.359	0.01446	290	75	-163.996	0.01021	295	70	-162.563	0.04697
A1L5C6	170	45	-248.898	0.09283	165	45	-253.377	0.06632	235	55	-245.124	0.14995
Q0PH99	240	10	-274.357	0.16995	240	10	-278.136	0.159	240	10	-275.347	0.16417
E1BFG0	210	95	-304.46	0.15335	205	90	-304.972	0.06024	205	90	-301.293	0.07332
F1MCL0	20	125	-373.124	0.0462	295	125	-356.533	0.14778	295	125	-361.375	0.13589
Q2KIF2	140	30	-353.345	0.09464	140	30	-357.507	0.0747	140	30	-357.942	0.07978
F1MYN5	285	100	-240.385	0.11546	165	145	-223.196	0.11231	285	100	-237.909	0.10292
E1B991	355	145	-366.257	0.0363	355	145	-373.107	0.02122	355	145	-383.692	0.03214
A5D7D5	310	55	-251.136	0.06088	310	60	-255.228	0.04217	310	50	-260.546	0.05406
P04272	230	100	-310.601	0.16313	230	100	-316.983	0.16133	225	105	-299.843	0.09201
A6QLB0	120	80	-321.007	0.08828	120	80	-322.612	0.0654	120	80	-311.452	0.07106
F1MQF0	75	95	-237.764	0.09078	75	95	-241.045	0.07042	70	95	-236.243	0.0103
F1MY79	220	85	-293.549	0.05339	200	145	-276.255	0.05137	220	85	-281.58	0.05054
Q2LGB2	255	45	-244.38	0.13353	40	40	-225.683	0.16536	255	45	-248.77	0.13222
P21214	25	45	-308.103	0.04565	25	45	-304.307	0.03847	25	45	-278.427	0.04758
P05307	220	45	-273.184	0.10256	220	45	-262.933	0.09558	220	45	-280.11	0.09268
Q0VCX2	330	130	-329.525	0.04721	330	130	-317.477	0.04544	330	130	-319.396	0.06519
Q58DK5	185	100	-236.188	0.11463	0	5	-229.037	0.15093	185	100	-224.173	0.14601
P09487	345	170	-251.302	0.02434	0	160	-264.386	0.06651	0	160	-234.938	0.09555
P22226	295	95	-252.815	0.00162	275	30	-220.964	0.15567	295	95	-234.686	0.00162
A7E3W2	345	140	-279.996	0.11543	350	135	-261.765	0.06207	265	105	-274.549	0.112
Q5E9G3	305	95	-288.044	0.14533	305	100	-302.396	0.05519	305	100	-301.93	0.07302
P02663	325	60	-312.376	0.11145	350	55	-302.046	0.01376	330	60	-304.817	0.06669
A6QNL0	120	85	-336.41	0.12347	120	85	-349.693	0.10711	120	85	-329.739	0.11947
F1MM32	170	95	-296.177	0.074	170	95	-291.208	0.07372	170	95	-301.821	0.07082
A6QPP2	330	120	-274.94	0.04559	330	120	-249.441	0.05687	330	120	-256.254	0.04571
G3N1H5	140	80	-278.684	0.10937	15	150	-256.778	0.04403	350	145	-272.342	0.16264
A5D7S4	300	60	-295.909	0.02786	290	65	-285.069	0.08265	300	60	-263.84	0.02868
Q0VCU3	305	55	-252.972	0.14802	305	55	-241.667	0.142	305	55	-247.712	0.14228
F1MK08	145	125	-274.274	0.12246	135	120	-297.567	0.04556	145	125	-277.993	0.11344
Q2KIV8	85	120	-302.033	0.11564	85	120	-300.43	0.10977	85	120	-303.18	0.0891
E1B8L8	160	105	-209.162	0.0825	165	100	-211.569	0.06819	160	105	-206.357	0.08039
Q3MHJ4	175	10	-183.893	0.01141	175	10	-180.724	0.01257	180	10	-176.061	0.01859
P54228	145	80	-268.708	0.09589	150	80	-244.767	0.11763	150	80	-240.339	0.10369
P11151	230	50	-234.233	0.02195	230	50	-232.391	0.00829	285	115	-217.695	0.08213
F1MLW8	245	95	-193.214	0.13362	200	25	-198.294	0.08121	195	25	-187.843	0.07097
F1MS32	260	55	-223.38	0.01394	265	65	-200.805	0.1708	260	55	-207.7	0.00767
P40673	85	35	-249.817	0.18747	85	35	-235.743	0.17643	85	35	-242.125	0.1794
Q8MHZ9	130	95	-310.165	0.08962	120	140	-301.169	0.08892	130	95	-281.241	0.09913
P37980	35	60	-245.207	0.03055	165	115	-245.846	0.08855	165	120	-233.127	0.12729
Q3SZ45	135	40	-233.731	0.18013	135	40	-225.912	0.17117	135	40	-228.062	0.17022
Q09TE3	45	10	-289.095	0.09228	145	45	-312.175	0.12898	45	10	-311.159	0.08357
Q3MHX0	165	165	-251.195	0.11849	180	160	-260.178	0.12179	180	160	-261.184	0.11882
Q2TBK6	240	65	-253.376	0.03755	225	60	-257.018	0.12099	225	60	-250.708	0.12616
G3X6G7	15	130	-257.976	0.15148	20	130	-264.539	0.12252	20	125	-252.191	0.13164
P31096	70	30	-230.1	0.06216	80	35	-212.396	0.07748	70	30	-219.255	0.10069
G3X7F3	130	80	-187.761	0.06018	300	20	-178.59	0.05547	130	80	-186.586	0.05057
P02666	15	65	-266.654	0.09876	15	65	-212.378	0.10723	15	65	-225.679	0.08843
Q2KIW4	275	80	-305.333	0.03755	275	80	-302.476	0.02244	275	80	-305.841	0.03415
Q8SPP7	10	165	-230.317	0.01422	10	165	-200.921	0.00816	340	165	-212.716	0.16756
E1BKZ9	50	100	-310.211	0.15634	50	100	-295.047	0.14601	50	100	-317.076	0.13965
Q1RMR4	335	20	-207.093	0.15879	340	15	-207.998	0.08589	335	20	-203.389	0.14916
F1MKH8	200	160	-268.548	0.16331	320	30	-268.832	0.15166	325	30	-266.871	0.10558
F1MJ00	305	70	-325.628	0.01899	305	70	-291.178	0.01902	305	70	-312.642	0.02281
A5PKB4	130	60	-244.665	0.12595	130	60	-237.405	0.1317	130	60	-234.963	0.1353
A6QPP7	275	35	-273.128	0.05067	275	35	-257.137	0.05427	185	30	-270.312	0.06858
P00978	355	120	-298.477	0.1221	355	120	-274.795	0.13096	350	120	-308.004	0.10412
P21793	265	80	-288.837	0.10675	265	80	-274.952	0.09592	50	105	-278.822	0.05134
E1BCJ2	280	60	-239.319	0.02523	280	60	-224.963	0.01981	270	15	-223.352	0.02935
Q2KJI3	275	80	-253.754	0.11821	270	75	-240.2	0.07806	275	80	-255.222	0.10882
F1N7T2	175	115	-327.142	0.078	175	115	-335.656	0.07776	175	115	-329.122	0.08054
E1BIT9	355	170	-311.769	0.15432	350	170	-305.766	0.1317	0	170	-328.153	0.13738
O46375	240	110	-196.156	0.11904	245	110	-205.725	0.0891	115	60	-201.043	0.10176
Q3SYW7	40	140	-252.532	0.04073	40	140	-240.304	0.04015	40	140	-237.791	0.04327
P00743	340	55	-294.701	0.16389	340	55	-276.558	0.16001	340	55	-284.597	0.14714
Q3T000	175	115	-206	0.18625	175	115	-205.602	0.17564	175	115	-215.102	0.17249
P34933	200	90	-305.863	0.06281	200	90	-297.775	0.06149	195	90	-281.854	0.0396
Q2KJC9	5	90	-309.924	0.04256	10	95	-303.149	0.11084	10	95	-313.86	0.09717
Q2KHZ8	150	80	-330.876	0.12298	155	80	-325.179	0.0699	150	80	-319.848	0.11054
Q28193	145	10	-280.179	0.0403	145	15	-262.35	0.06054	140	10	-286.882	0.02183
Q32LG3	215	90	-239.651	0.17365	215	90	-224.915	0.16689	205	70	-229.305	0.17854
B0JYP8	110	95	-301.183	0.0858	110	95	-297.722	0.05761	110	95	-303.167	0.07452
Q3SX46	210	10	-254.118	0.17704	210	10	-237.338	0.16405	210	10	-256.155	0.16564
Q2TBT6	50	80	-278.156	0.1512	305	135	-273.198	0.08424	305	135	-276.376	0.0961
Q0IIH5	10	100	-272.984	0.04987	10	100	-288.962	0.04302	10	100	-269.568	0.04287
A3KLR9	130	155	-264.812	0.0148	315	95	-254.94	0.1069	130	155	-268.758	0.0118
A5PKJ8	180	50	-98.6134	0.15004	180	50	-98.6377	0.13977	180	50	-99.3896	0.13867
Q5EA79	340	150	-278.933	0.08332	90	45	-284.794	0.12616	90	45	-262.824	0.13546
Q3ZBS7	105	120	-281.974	0.00306	60	90	-264.375	0.11344	60	90	-272.754	0.11653
P15497	245	70	-346.41	0.10311	245	70	-364.111	0.09681	245	70	-357.1	0.1098
F1N076	215	105	-338.925	0.05565	215	105	-321.493	0.06036	215	105	-316.884	0.05177
A7MBI8	60	175	-248.926	0.08308	60	175	-244.607	0.05287	65	175	-247.044	0.07066
O46406	290	80	-317.595	0.07247	290	80	-302.823	0.06819	290	80	-329.997	0.06537
Q6ZXD2	290	95	-287.267	0.05165	290	95	-303.639	0.04639	295	95	-297.67	0.10843
E1BI28	350	145	-248.553	0.17579	350	145	-229.254	0.17524	340	155	-225.871	0.06039
Q5QQ49	55	155	-313.615	0.01569	60	155	-293.523	0.01495	60	155	-285.274	0.01657
E1BJS1	55	110	-260.004	0.17512	55	110	-243.221	0.17148	55	110	-262.039	0.16206
P79334	25	100	-352.516	0.06164	75	85	-341.791	0.007	25	105	-346.324	0.06048
Q3ZBG1	195	135	-192.279	0.06391	25	90	-184.351	0.10149	150	90	-195.036	0.12133
F1MGY9	5	10	-253.328	0.00587	50	75	-251.408	0.12989	40	60	-248.485	0.02513
P56965	355	90	-265.644	0.16172	355	90	-274.848	0.1454	355	90	-259.24	0.15374
A1A4K5	190	140	-360.042	0.06966	190	140	-347.846	0.06372	190	140	-349.281	0.07296
Q76LV2	265	155	-265.896	0.00942	265	155	-274.382	0.0048	265	155	-256.25	0.00816
Q0VD19	5	100	-344.396	0.15723	5	100	-338.405	0.15087	5	100	-343.262	0.14222
P18341	150	60	-236.792	0.07745	155	60	-218.457	0.13971	150	60	-225.112	0.06895
E1BI82	355	135	-350.43	0.09192	355	135	-331.425	0.08219	355	135	-339.962	0.08449
O02853	100	60	-232.217	0.12653	95	50	-207.134	0.17582	100	55	-246.817	0.1627
Q1RMM9	280	95	-302.478	0.0988	275	100	-297.14	0.07235	280	95	-302.203	0.09247
P02754	165	40	-192.932	0.06482	355	50	-187.39	0.18946	355	50	-198.43	0.18726
P81265	345	100	-257.202	0.08904	345	100	-254.249	0.06635	345	100	-239.512	0.0829
P22444	250	70	-248.296	0.03299	250	70	-242.377	0.01807	250	70	-245.046	0.02966
F1N789	20	55	-345.809	0.00446	175	80	-306.718	0.07482	175	80	-307.867	0.08864
Q5E9F7	120	105	-194.413	0.17897	225	140	-178.976	0.08045	120	105	-178.242	0.16307
E1BLC6	230	150	-247.881	0.0174	230	150	-245.553	0.0129	230	150	-244.522	0.01749
F1MBS0	305	50	-253.182	0.10999	305	50	-225	0.11161	300	50	-248.732	0.09601
Q08E14	165	30	-336.177	0.03498	310	30	-334.363	0	310	30	-334.292	0.00501
F1MX65	60	60	-315.5	0.14475	60	60	-324.82	0.13585	60	60	-325.942	0.13702
A5PKH3	130	145	-254.358	0.17038	130	145	-244.771	0.16133	130	145	-268.355	0.1549
Q3SZ01	270	115	-227.697	0.15148	270	115	-225.53	0.13436	270	115	-229.206	0.14546
Q2TBI0	265	110	-261.407	0.03798	260	115	-274.974	0.06219	190	115	-268.054	0.06648
A3KMV5	90	115	-283.197	0.01394	90	115	-258.958	0.02807	90	115	-262.433	0.03752
P13752	200	45	-250.11	0.08987	200	40	-242.399	0.16325	200	45	-255.523	0.07748
Q2KJF1	250	10	-284.359	0.02486	245	10	-270.058	0.02819	250	10	-264.088	0.0348
A5PJ69	115	65	-261.35	0.14695	130	50	-250.702	0.13252	270	155	-265.697	0.11182
A1L595	35	30	-255.038	0.00819	185	115	-260.415	0.11164	35	30	-269.789	0.00566
E1BGJ4	170	115	-418.814	0.04886	170	115	-442.426	0.05061	170	115	-395.964	0.06008
A7E3Q8	155	45	-310.516	0.06892	155	45	-296.923	0.06858	130	95	-299.114	0.10087
P62998	205	105	-205.677	0.19517	135	25	-188.499	0.09167	205	105	-209.376	0.17475
Q0IIG7	335	75	-204.551	0.18242	330	75	-193.345	0.16643	335	75	-212.254	0.16821
G1K122	180	145	-220.096	0.13855	25	5	-221.162	0.16292	180	145	-218.972	0.12359
Q0P5L5	50	90	-250.784	0.05871	295	60	-243.991	0.13619	50	90	-237.765	0.06418
F1MS76	85	85	-323.499	0.06501	85	85	-314.923	0.06678	85	85	-300.86	0.06204
Q2KIW9	80	140	-220.912	0.18414	80	140	-222.135	0.17625	80	140	-223.064	0.17288
Q95M17	10	160	-361.167	0.15396	15	155	-353.195	0.10136	10	160	-348.102	0.15961
F1N1D8	250	95	-379.164	0.10812	250	95	-338.456	0.10879	250	95	-361.11	0.10595
F1MMR8	25	105	-284.51	0.1047	25	105	-265.433	0.10733	25	105	-261.77	0.12329
Q28161	270	80	-310.094	0.08103	270	80	-314.708	0.07436	270	80	-308.629	0.07745
P12799	215	160	-225.276	0.00095	210	160	-215.299	0.00581	215	160	-214.472	0.00398
Q3SZF2	75	40	-201.332	0.02321	180	105	-208.175	0.13234	290	25	-208.949	0.18215
Q3SYT3	20	120	-300.338	0.06455	355	135	-282.323	0.01214	355	135	-277.091	0.01981
Q0VCX4	70	60	-354.135	0.08886	70	60	-342.637	0.09347	90	65	-356.517	0.05632
A3KN27	175	100	-308.35	0.05006	175	100	-282.142	0.04703	175	100	-290.581	0.06241
Q05927	60	30	-310.404	0.18408	60	30	-310.342	0.16955	60	30	-291.421	0.16732
F1MAV0	265	35	-288.133	0.07858	265	35	-307.971	0.06005	265	10	-292.418	0.06119
E1BKK9	300	60	-235.839	0.14436	300	55	-233.388	0.12882	300	60	-236.802	0.13405
P0CH28	110	110	-236.705	0.14744	110	110	-224.239	0.14729	40	135	-227.805	0.08981
Q9XSC6	85	70	-286.906	0.00599	85	70	-281.017	0.00217	85	70	-273.706	0.00764
P80457	130	105	-364.366	0.04883	325	110	-357.019	0.05886	325	110	-361.142	0.05687
F1ML75	175	150	-214.836	0.00538	175	150	-210.019	0.00416	180	150	-206.806	0.10155
F1MMR6	105	80	-262.501	0.11992	110	80	-249.191	0.07715	110	80	-260.571	0.07265
F1N1G1	0	110	-275.514	0.03434	235	90	-307.643	0.12106	0	110	-277.887	0.03357
Q2KIT0	285	95	-300.948	0.04816	285	95	-270.046	0.03828	285	95	-273.862	0.05018
F1MNI4	255	75	-211.752	0.0825	250	75	-195.737	0.09048	255	75	-210.182	0.0703
Q3SWW8	80	35	-292.031	0.04795	80	35	-293.623	0.0448	80	35	-305.867	0.05525
Q3MHP2	340	20	-187.279	0.17506	335	80	-182.397	0.18542	335	75	-202.929	0.15356
P38657	40	140	-285.042	0.00511	35	140	-287.956	0.0004	40	140	-281.185	0.01177
F1MJQ1	80	55	-196.457	0.08082	80	55	-210.645	0.07332	80	55	-194.338	0.0769
G3N3R5	170	105	-318.195	0.06152	170	105	-328.104	0.08195	170	105	-343.443	0.09011
Q2KJJ7	55	95	-313.678	0.09647	55	95	-300.575	0.10084	55	95	-290.41	0.10662
F1MXX6	300	90	-277.596	0.17955	320	85	-280.271	0.00318	300	90	-268.383	0.17493
G3N2P6	340	135	-225.566	0.01067	355	140	-237.824	0.00526	340	135	-239.857	0.01043
Q29444	30	95	-342.175	0.10583	30	95	-333.628	0.11032	30	95	-319.647	0.12096
E1BHY6	100	115	-231.57	0.01511	100	120	-232.905	0.00281	270	55	-212.817	0.16408
F1ME65	40	10	-313.669	0.00859	40	10	-318.36	0.00098	40	10	-328.409	0.00382
A7MBI6	160	85	-249.285	0.10476	160	85	-247.566	0.08867	160	85	-249.445	0.09647
O18739	260	100	-266.918	0.0411	260	100	-265.344	0.02981	260	100	-262.858	0.03648
A4FUA8	95	95	-226.971	0.03816	95	95	-226.174	0.0281	140	50	-213.597	0.09944
B0JYR0	270	40	-353.533	0.06574	270	40	-344.432	0.06259	270	40	-342.04	0.07198
Q5E9I6	265	45	-222.202	0.03	185	115	-209.109	0.15971	265	45	-209.102	0.03504
Q08DV2	155	135	-186.619	0.02306	20	120	-196.729	0.14166	155	135	-177.463	0.01211
Q3T169	175	60	-245.126	0.11054	175	60	-239.204	0.10867	175	60	-268.282	0.09439
F1MZI6	20	60	-269.937	0.10626	125	60	-254.363	0.14943	125	60	-264.792	0.14949
F1MJ28	260	110	-356.438	0.02868	315	170	-357.406	0.00107	295	145	-355.701	0.10042
A6QNV3	175	40	-147.619	0.13631	175	40	-137.342	0.14084	170	40	-144.548	0.13326
F1MU12	20	35	-347.519	0.03186	20	35	-347.86	0.02697	20	35	-346.504	0.03614
G3N156	75	140	-310.322	0.04162	75	145	-295.267	0.118	70	140	-306.874	0.01251
Q58D04	235	55	-224.744	0.10812	105	105	-225.91	0.15481	235	55	-225.379	0.08559
P21809	100	95	-352.001	0.14888	100	95	-340.199	0.14533	100	95	-334.969	0.14151
E1BNG2	145	55	-277.087	0.02134	145	55	-253.264	0.02575	140	55	-260.363	0.01348
Q5E997	90	105	-226.734	0.00239	230	100	-217.418	0.06482	230	100	-218.208	0.05984
Q0VCN9	5	115	-270.609	0.11827	0	110	-262.573	0.08079	0	110	-300.193	0.07125
Q9N2I2	110	125	-395.135	0.06152	110	125	-370.492	0.04975	110	125	-365.406	0.05213
F1MXG6	115	110	-265.588	0.0344	305	65	-293.474	0.02593	310	60	-276.767	0.01605
A6QLI0	260	10	-205.308	0.07653	290	15	-217.86	0.17301	260	10	-222.222	0.06602
A6QNS6	280	110	-197.528	0.03929	280	110	-204.441	0.02853	280	110	-207.381	0.0336
E1BE60	245	165	-269.428	0.09173	245	165	-240.146	0.08427	245	165	-252.15	0.0843
Q2HJD1	60	100	-240.573	0.16747	55	100	-240.368	0.1305	180	90	-229.738	0.02948
Q0V8R6	55	55	-280.412	0.0617	130	145	-261.17	0.09742	55	55	-266.12	0.06119
E1BD43	65	65	-320.466	0.05742	65	65	-308.992	0.05213	210	90	-315.099	0.14934
Q8SPJ1	275	55	-279.227	0.04972	40	145	-270.706	0.09999	175	35	-277.857	0.12154
A7Z014	290	135	-275.821	0.00144	290	135	-278.295	0.00437	290	130	-254.317	0.02627
Q0P5J4	295	55	-285.136	0.00602	295	55	-294.86	0.00538	295	55	-298.709	0.01306
P19120	160	75	-279.072	0.08659	160	75	-283.943	0.07999	160	75	-269.262	0.06394
E1BDR2	270	135	-360.139	0.01202	290	45	-340.5	0.11057	270	130	-353.641	0.05822
A6QP79	0	0	-0.00205	2	0	0	-0.00205	2	0	0	-0.00205	2
Q2KJ63	30	130	-363.779	0.03073	30	130	-348.651	0.02504	30	130	-337.618	0.04006
A6QL48	340	50	-277.004	0.14903	340	50	-267.495	0.15075	340	50	-268.813	0.14802
E1BBP1	60	75	-296.851	0.10005	235	90	-284.992	0.13399	60	75	-290.213	0.12047
P02668	245	90	-232.076	0.06403	0	100	-207.858	0.09124	255	95	-226.043	0.10402
F1MU34	215	40	-330.77	0.01144	200	135	-311.619	0.07849	215	40	-320.435	0.01208
Q3ZC84	115	25	-311.839	0.00887	115	25	-294.001	0.00771	350	90	-292.024	0.14576
P69678	170	55	-261.044	0.14448	170	55	-249.125	0.13686	170	55	-246.461	0.14286
F1N362	15	145	-286.888	0.01492	15	145	-303.389	0.00501	15	145	-300.564	0.02403
F1MSA6	55	60	-234.775	0.09824	40	50	-246.068	0.06476	65	70	-249.663	0.10421
A5PKH0	205	85	-199.809	0.12219	205	80	-189.045	0.16964	20	55	-183.778	0.04143
E1B8B5	250	110	-288.271	0.10601	250	110	-273.126	0.09347	250	110	-288.746	0.10424
Q08E20	175	125	-335.802	0.08693	175	125	-327.442	0.07232	175	125	-304.07	0.09421
G3MYD9	300	55	-277.653	0.06751	300	55	-303.85	0.04473	300	55	-288.414	0.06834
F1MI98	30	75	-295.542	0.05813	35	80	-317.275	0.08323	35	80	-288.522	0.11188
F6S1Q0	315	50	-318.948	0.09669	315	50	-339.402	0.07764	315	50	-328.978	0.08968
Q2HJ33	295	105	-264.837	0.00049	295	105	-228.902	9e-05	300	115	-245.163	0.0044
P19879	300	90	-289.041	0.09656	300	90	-313.367	0.08953	300	90	-274.518	0.08598
E1BMJ0	325	20	-218.855	0.14011	330	20	-246.149	0.10775	330	20	-234.394	0.12246
Q3T0I2	125	140	-236.396	0.01737	120	140	-251.513	0.00471	125	140	-234.401	0.00945
F1MBV6	50	120	-276.061	0.07898	50	120	-268.723	0.06865	50	120	-279.276	0.07357
F1N455	250	140	-352.531	0.04957	250	140	-344.943	0.04244	250	140	-344.935	0.04544
Q3ZCH5	50	10	-274.36	0.11167	50	10	-285.059	0.0839	15	110	-274.868	0.1465
Q2TBL6	10	160	-336.732	0.11463	10	160	-323.488	0.09861	30	165	-317.166	0.0902
E1BJB1	220	10	-301.502	0.16869	220	10	-285.065	0.16301	225	10	-297.069	0.15273
P02702	110	40	-341.988	0.17964	110	40	-311.649	0.17668	110	40	-317.696	0.16273
P28783	50	110	-271.147	0.0381	50	110	-243.418	0.03727	60	105	-242.599	0.05391
Q148J4	180	135	-212.727	0.10601	175	130	-223.462	0.12567	180	130	-226.958	0.15705
F1MNN7	175	110	-259.252	0.07427	275	110	-270.812	0.03978	180	135	-266.392	0.08663
Q76LV1	20	20	-311.23	0.09873	15	20	-304.365	0.09769	20	20	-305.779	0.09173
P40682	310	75	-173.655	0.02871	220	65	-182.428	0.16365	220	65	-174.397	0.17588
F1MMK9	165	105	-392.282	0.10029	165	105	-376.598	0.10161	165	105	-396.609	0.0932
E1BEL6	345	50	-263.851	0.06378	235	80	-227.995	0.05241	350	50	-252.635	0.05519
A6H6X2	40	80	-251.685	0.06562	280	155	-228.372	0.01917	280	155	-239.132	0.01633
P05786	190	90	-346.461	0.05275	190	90	-337.254	0.05984	190	90	-350.047	0.06651
A6QLL8	215	60	-353.622	0.12573	215	60	-338.127	0.11298	215	60	-344.437	0.11629
F1MTI7	80	130	-257.907	0.13509	80	125	-252.574	0.12953	80	130	-250.458	0.12595
E1BFQ6	355	20	-277.144	0.0226	125	75	-278.433	0.03018	110	35	-269.38	0.09558
Q3T0A3	155	140	-216.104	0.01413	165	145	-205.864	0.06577	165	145	-227.076	0.05703
A6QP30	210	85	-416.04	0.1272	210	85	-405.538	0.11607	210	85	-416.046	0.12479
E1BAT3	235	65	-200.582	0.04602	235	65	-210.356	0.03908	235	65	-203.646	0.0481
Q29437	70	65	-386.726	0.03474	70	65	-364.331	0.04712	70	65	-354.93	0.04596
E1BNY3	230	40	-297.546	0.08397	235	40	-288.637	0.01562	235	40	-284.277	0.02819
A4IFS7	110	35	-248.595	0.0266	95	45	-239.626	0.18065	110	35	-246.364	0.02501
Q5E9E3	320	90	-315.52	0.05642	320	90	-280.464	0.09494	320	90	-282.618	0.08666
F1MMS7	350	140	-347.161	0.1413	350	140	-353.12	0.13283	350	140	-352.455	0.13433
A6QPW7	345	75	-317.925	0.02098	345	75	-272.2	0.03908	345	75	-301.76	0.03131
F1N1W3	335	110	-366.082	0.10042	335	110	-340.577	0.09409	335	110	-361.549	0.09381
P41361	135	115	-281.579	0.12754	135	115	-292.951	0.10512	135	115	-280.944	0.10824
Q148C9	110	70	-230.301	0.10329	110	70	-229.279	0.09265	110	70	-211.246	0.08262
G3MXG6	100	105	-200.993	0.06274	140	30	-194.87	0.14558	100	110	-192.562	0.05415
P31098	205	50	-215.143	0.16307	205	50	-219.168	0.15821	205	50	-212.942	0.15402
Q08DN1	340	95	-241.562	0.06663	340	95	-241.403	0.0344	340	95	-237.622	0.05382
F1N720	295	135	-286.577	0.02296	150	85	-280.558	0.00037	150	85	-288.332	0.00654
F1MUB9	255	45	-235.085	0.16665	255	45	-239.979	0.15524	255	45	-238.477	0.15527
Q3SYU2	195	75	-284.721	0.0177	200	70	-291.801	0.02801	195	75	-280.788	0.02104
Q769I5	135	135	-362.7	0.00954	135	135	-369.725	0.00716	135	135	-391.417	0.01538
F1MZQ5	55	40	-294.162	0.10993	55	40	-296.292	0.10259	55	40	-288.612	0.10191
Q5BIR5	70	55	-308.237	0.04302	70	55	-314.675	0.03351	70	55	-304.416	0.03523
O02751	90	70	-267.434	0.1679	90	70	-262.072	0.15402	90	70	-264.099	0.16237
F1N3Q7	320	85	-221.481	0.03675	320	85	-253.894	0.03348	320	85	-231	0.05966
Q3T0L2	165	50	-252.666	0.04889	165	50	-251.668	0.04162	165	50	-266.609	0.03837
Q58DD4	235	165	-188.855	0.00688	235	165	-191.152	0.0018	235	165	-194.282	0.00749
G3N2D8	30	125	-284.591	0.0533	250	85	-282.225	0.1357	245	90	-276.092	0.13057
Q1JP75	55	120	-201.076	0.11393	55	120	-197.285	0.09794	135	65	-204.171	0.02523
P55859	315	30	-267.818	0.16695	305	55	-266.341	0.05761	305	55	-265.707	0.06082
F1N6H6	60	125	-235.866	0.04235	195	55	-219.924	0.03052	195	55	-225.888	0.03712
A6QLZ0	95	45	-305.142	0.0329	95	45	-272.254	0.02779	95	45	-278.743	0.03085
A6QLY7	160	100	-405.677	0.04675	160	100	-379.292	0.05892	160	100	-415.52	0.05388
P84080	15	110	-221.819	0.02406	90	40	-216.692	0.11427	15	110	-213.394	0.02416
Q5EA01	135	30	-284.374	0.05904	135	30	-274.544	0.06938	135	30	-285.034	0.044
F1N2D5	235	55	-268.762	0.10843	225	60	-276.091	0.10329	45	110	-260.521	0.09546
Q9TR36	275	45	-262.106	0.18349	280	20	-260.42	0.18542	270	40	-249.495	0.07513
A5D7M6	165	110	-411.079	0.02137	165	110	-410.737	0.01131	165	110	-392.919	0.01792
A6QNW7	0	0	-0.00205	2	0	0	-0.00205	2	0	0	-0.00205	2
F1MIQ2	100	110	-277.926	0.02293	100	110	-277.447	0.0133	100	110	-283.949	0.02055
E1BI98	295	10	-386.817	0.1072	295	10	-376.77	0.10583	295	10	-384.639	0.09883
F1MT12	265	70	-265.993	0.09849	265	70	-263.415	0.10057	265	70	-244.766	0.09898
E1BF48	170	90	-258.434	0.08317	130	140	-248.134	0.16023	130	140	-268.447	0.15117
E1BBP4	315	110	-307.247	0.00789	180	50	-287.908	0.09727	315	110	-284.508	0.01303
G3MZ71	185	40	-246.307	0.08724	220	95	-262.315	0.09182	220	90	-264.942	0.07852
F1MG91	115	115	-274.565	0.09604	115	115	-262.877	0.08672	115	115	-258.452	0.08877
Q2KJ51	210	100	-282.883	0.01147	210	100	-252.927	0.0085	210	100	-294.245	0.00731
A1A4R1	315	20	-224.719	0.08968	315	20	-244.515	0.07608	315	20	-226.807	0.07409
O02659	155	20	-323.833	0.09026	150	20	-301.829	0.11182	155	20	-301.888	0.0832
P45478	45	120	-256.982	0.13552	45	120	-260.325	0.11023	45	120	-258.537	0.13102
P01035	195	25	-168.129	0.16619	0	55	-159.952	0.17105	355	70	-173.086	0.00835
O77588	355	5	-320.25	0.05932	350	5	-310.796	0.04082	10	5	-298.173	0.09506
Q17QG2	150	125	-289.494	0.13381	150	125	-277.337	0.12466	150	125	-287.212	0.13717
F1MPE1	250	80	-346.841	0.05956	250	80	-337.581	0.05131	250	80	-326.739	0.06287
P08037	50	40	-299.86	0.02734	50	40	-283.413	0.02021	50	40	-278.373	0.02691
P18915	170	65	-246.337	0.17301	170	65	-248.652	0.16493	155	120	-239.26	0.10454
E1BBX5	80	75	-341.438	0.10005	80	75	-328.333	0.081	95	65	-324.147	0.13133
E1B725	165	135	-285.065	0.05626	160	130	-282.606	0.15729	160	65	-297.222	0.15533
P80109	180	145	-341.762	0.11457	180	145	-347.809	0.11375	180	145	-346.024	0.11436
A1A4K3	185	45	-302.721	0.10931	185	45	-294.178	0.12411	180	45	-311.592	0.02935
A5D7R6	330	45	-343.156	0.00881	330	45	-317.038	0.00725	325	45	-324.751	0.0266
A6QLR1	175	25	-182.234	0.00052	175	25	-189.144	0.00034	180	35	-187.459	0.0037
Q4U5R3	240	70	-228.381	0.11928	240	70	-240.331	0.10259	40	140	-213.168	0.04027
F1MLQ1	190	130	-221.751	0.07323	50	15	-223.563	0.08106	190	130	-230.128	0.06232
Q29RQ1	45	75	-254.923	0.0595	60	85	-251.877	0.02633	60	85	-258.293	0.03474
Q58CS8	20	60	-325.017	0.15093	20	60	-309.766	0.14543	20	60	-318.111	0.1564
A4FV69	320	125	-248.797	0.12466	215	95	-257.666	0.034	320	130	-245.676	0.14264
G3MYU2	215	150	-320.664	0.05015	215	150	-351.058	0.04048	215	150	-332.018	0.04391
F1N4X7	75	50	-280.224	0.09491	70	45	-275.596	0.0887	320	65	-281.528	0.122
P61585	165	65	-215.205	0.06987	165	65	-205.214	0.06305	165	65	-209.262	0.06299
A6QL77	75	15	-390.877	3e-05	75	15	-364.005	0	75	15	-354.327	0.0015
Q148H7	100	45	-271.723	0.1416	100	45	-275.14	0.1313	100	45	-279.139	0.13066
F1MNL4	245	105	-258.265	0.0673	245	105	-255.523	0.05849	130	75	-239.423	0.00982
Q3T0F5	280	150	-196.946	0.19444	110	145	-196.58	0.16026	260	70	-205.672	0.06057
A3KMY1	150	150	-299.373	0.02526	210	35	-283.561	0.04822	150	150	-301.401	0.01608
Q32KV6	305	10	-239.82	0.0747	305	10	-251.69	0.08167	300	30	-246.256	0.17484
A6QM01	270	100	-346.216	0.01636	270	100	-318.534	0.01816	270	100	-327.073	0.01942
G3X7N4	160	85	-280.366	0.15542	160	85	-274.055	0.14402	160	85	-269.42	0.14946
F1N6G4	195	145	-314.718	0.15919	190	145	-322.917	0.1612	195	145	-326.772	0.15698
E1BF27	230	80	-358.377	0.03837	230	80	-353.675	0.03847	230	80	-354.078	0.03932
M0QVY0	340	150	-282.247	0.00171	340	150	-281.87	0.00021	340	150	-295.978	0.01425
A6H7J6	295	90	-274.168	0.00284	290	90	-269.784	0.01908	295	90	-268.479	0.01211
Q5E946	355	90	-209.242	0.15857	205	35	-219.792	0.10451	355	90	-211.119	0.13619
Q3ZBW5	135	45	-222.74	0.02137	135	45	-206.405	0.01752	135	45	-217.075	0.01795
P00727	135	120	-311.487	0.08733	135	120	-307.413	0.08803	140	120	-298.253	0.11577
Q07537	255	35	-278.156	0.02948	255	35	-267.683	0.02364	255	35	-273.128	0.02159
Q0VCX1	255	100	-308.933	0.03116	280	40	-297.278	0.16772	280	40	-318.858	0.15588
Q3T0Q4	290	90	-242.856	0.18952	290	90	-231.169	0.18548	325	40	-247.834	0.17753
O77834	130	80	-255.158	0.07819	285	65	-243.121	0.17322	5	140	-242.71	0.04963
A6QNX5	350	20	-306.786	0.00015	180	90	-310.658	0.04296	180	90	-319.941	0.05106
A5PJT7	50	70	-288.079	0.1882	30	70	-267.71	0.14943	50	70	-269.46	0.17885
A7YWG4	115	60	-220.423	0.17175	115	60	-229.631	0.16337	115	60	-234.494	0.16448
A4IFN4	200	135	-292.906	0.02648	200	135	-270.968	0.02504	200	135	-290.16	0.03119
Q5E9X0	100	55	-269.572	0.00269	280	55	-245.166	0.1313	100	55	-248.801	0.00758
A1L528	275	165	-195.511	0.18304	300	60	-197.042	0.06574	275	165	-195.549	0.17184
Q2HJB6	160	140	-401.867	0.00819	160	140	-364.631	0.00547	160	140	-378.887	0.01055
F1N0Y0	110	50	-289.539	0.06198	110	50	-278.867	0.06085	315	50	-272.675	0.0266
G3MXK6	245	135	-248.583	0.0248	245	135	-232.234	0.01795	260	140	-225.856	0.04599
Q9N0V4	85	125	-260.547	0.09485	80	125	-255.931	0.10644	85	125	-264.231	0.09161
F1MVS9	150	120	-327.883	0.06354	150	120	-308.046	0.0669	150	120	-308.604	0.06455
A7E3S8	255	50	-304.127	0.03367	255	50	-297.113	0.02443	255	50	-297.176	0.0392
O97817	30	100	-284.68	0.03899	30	100	-289.691	0.02932	30	100	-285.734	0.04385
P63048	45	160	-228.651	0.09033	35	155	-213.203	0.08598	35	155	-228.621	0.06923
G3N0V2	260	150	-352.639	0.03388	260	150	-358.75	0.04336	260	150	-376.763	0.0337
Q3SZB0	70	95	-259.96	0.11048	70	95	-256.871	0.08785	70	95	-247.843	0.10772
Q3ZBZ1	70	40	-322.917	0.05091	70	35	-299.611	0.09883	70	40	-306.643	0.0607
P19661	170	55	-330.249	0.08479	170	55	-276.228	0.08864	170	55	-308.681	0.08455
F1MW08	150	90	-308.858	0.10357	150	90	-282.766	0.10516	150	90	-292.896	0.10983
E1B9D7	100	80	-248.379	0.01082	100	80	-252.304	0.01804	100	80	-230.796	0.0129
A5PJN2	335	60	-265.811	0.13176	335	60	-273.092	0.13475	55	50	-259.545	0.091
A5D960	0	150	-274.765	0.09681	0	150	-258.403	0.10142	0	150	-273.46	0.08699
Q3ZBH5	90	85	-224.42	0.03727	275	45	-208.792	0.1546	5	20	-215.751	0.16435
Q3T0K1	220	120	-284.274	0.06219	225	125	-305.532	0.0496	225	125	-277.983	0.0484
F1N2W0	75	130	-261.618	0.06424	75	135	-256.127	0.04262	75	130	-254.842	0.04605
Q3ZBV9	160	130	-256.638	0.17291	230	45	-240.665	0.10039	160	130	-268.903	0.16714
E1BKQ9	110	55	-223.154	0.05648	110	55	-214.786	0.05198	110	55	-209.731	0.04957
Q6B855	290	130	-273.966	0.00945	290	130	-275.999	0.01731	270	95	-257.495	0.10454
A5D7C8	20	125	-269.601	0.05525	20	125	-265.539	0.054	20	125	-262.068	0.04516
Q9BGI2	285	45	-306.991	0.0654	235	45	-258.982	0.05632	285	45	-284.969	0.06024
A2I7N3	115	125	-255.828	0.09467	120	125	-274.413	0.12959	120	125	-266.051	0.12619
Q3SZ16	245	20	-285.357	0.09745	230	20	-298.066	0.11387	245	20	-304.971	0.08806
Q3MHX6	310	65	-346.036	0.09317	310	65	-335.551	0.09776	310	65	-325.891	0.09363
E1BEC6	220	45	-207.394	0.08121	220	45	-194.73	0.08069	220	45	-202.609	0.07962
F1MHF1	250	110	-273.374	0.12164	250	110	-258.888	0.11259	250	110	-255.266	0.10873
P00514	230	90	-312.994	0.02523	230	90	-284.231	0.041	230	90	-280.007	0.05186
Q2KI84	65	95	-275.267	0.02966	65	95	-280.221	0.02786	65	95	-275.337	0.03685
F1MC11	0	105	-303.069	0.07479	220	35	-300.843	0.03626	220	35	-305.135	0.051
Q17QG8	30	25	-201.45	0.06959	30	25	-228.204	0.06816	205	120	-212.203	0.05039
F1MUZ8	70	55	-245.347	0.12879	70	55	-264.36	0.1231	70	55	-254.41	0.12803
A5PKI3	150	170	-200.784	0.1882	145	170	-186.388	0.16298	145	170	-186.998	0.16203
E1BLR9	10	120	-173.379	0.02361	10	120	-171.975	0.0274	10	120	-177.97	0.03192
A5PJH7	55	75	-344.786	0.04758	55	75	-337.318	0.0418	55	75	-334.293	0.04669
O62829	65	140	-331.401	0.09143	65	140	-321.753	0.07819	90	160	-314.463	0.02223
F1MSQ6	310	60	-336.357	0.10681	310	60	-317.728	0.10956	310	60	-306.825	0.10497
F1MTT3	210	65	-221.462	0.06164	135	130	-241.683	0.07366	135	130	-223.72	0.08956
Q3SZZ9	95	110	-239.039	0.0444	95	115	-236.614	0.06033	95	110	-220.823	0.04281
G5E6G2	115	70	-215.477	0.10736	305	40	-222.318	0.15212	305	45	-201.846	0.10818
Q2KIV9	145	155	-281.495	0.17701	130	155	-256.465	0.0755	130	155	-267.649	0.081
G3X701	55	115	-193.016	0.03165	35	75	-197.456	0.17799	55	115	-200.276	0.02379
Q28065	235	120	-202.44	0.06198	235	120	-215.766	0.03935	235	85	-191.923	0.07959
Q3SZB7	260	100	-232.039	0.01104	140	140	-240.417	0.05541	260	100	-224.296	0.01196
F1MBF6	300	65	-231.291	0.08403	300	65	-229.41	0.07675	300	65	-227.85	0.09366
F1MW38	285	95	-290.258	0.03082	285	95	-281.046	0.02538	285	95	-295.398	0.02886
Q3ZBZ6	245	60	-238.087	0.09341	10	115	-238.166	0.02666	245	60	-233.541	0.0803
F1MJM4	15	45	-284.927	0.02706	15	45	-258.632	0.03412	155	80	-270.111	0.11222
F1N5M2	40	60	-332.521	0.06559	45	60	-308.022	0.07586	40	60	-321.284	0.05226
Q17QC1	220	60	-283.858	0.04376	250	105	-270.944	0.17181	250	105	-288.388	0.18068
O02739	70	55	-304.487	0.06589	65	55	-311.494	0.04736	70	55	-307.663	0.06073
P50397	310	120	-319.874	0.07598	310	120	-319.103	0.07311	310	120	-311.848	0.0703
F1MF70	195	15	-272.919	0.14521	195	15	-269.555	0.13118	195	15	-285.339	0.1302
F1N0T3	65	55	-283.717	0.03688	65	55	-299.556	0.03278	65	55	-289.515	0.03446
Q2KJ93	60	65	-212.643	0.09543	60	65	-211.159	0.09014	60	65	-228.144	0.10393
Q5E9G7	65	70	-182.077	0.0407	65	70	-184.399	0.04223	65	70	-171	0.04302
F1N1Z8	180	80	-215.975	0.01764	180	60	-210.503	0.16182	180	60	-210.17	0.16906
A6H797	240	55	-226.912	0.15937	185	155	-207.463	0.18909	240	55	-243.803	0.15017
Q5DPW9	150	140	-188.075	0.17032	150	140	-186.242	0.16539	150	140	-190.868	0.16506
Q8MJ24	230	50	-400.11	0.12818	230	50	-386.259	0.12714	230	50	-411.809	0.11934
A5PJE3	350	125	-329.111	0.10815	350	125	-322.305	0.10277	350	125	-338.566	0.10338
F1MJQ3	155	25	-276.718	0.15234	160	85	-265.297	0.11066	150	25	-258.942	0.11213
F1N6D4	5	110	-253.518	0.13387	5	110	-273.825	0.12962	5	110	-288.349	0.11723
A5D984	300	150	-286.062	0.03232	300	150	-302.421	0.01199	300	150	-275.356	0.0226
Q08D91	215	150	-310.855	0.07069	215	150	-336.308	0.05758	215	150	-323.476	0.0847
Q3T0E5	130	20	-279.172	0.06067	305	100	-284.152	0.12781	305	100	-254.404	0.14368
P58073	20	30	-232.847	0.15338	25	30	-222.354	0.18065	25	30	-244.519	0.18674
E1B9H5	240	115	-297.531	0.06862	240	115	-292.215	0.06137	240	115	-299.353	0.07036
F1MLI8	25	110	-181.693	0.09534	25	110	-168.059	0.08614	25	110	-186.332	0.08265
Q3ZBD7	185	70	-291.397	0.05987	250	115	-289.58	0.08504	185	70	-279.052	0.05917
E1BG25	50	125	-264.246	0.03657	50	125	-260.403	0.02214	255	25	-250.055	0.03755
F1MNM2	165	135	-304.78	0.15842	320	65	-316.48	0.05415	160	130	-306.408	0.12038
Q1RMU6	70	15	-277.554	0.14218	70	15	-275.915	0.13537	70	15	-268.338	0.13478
P35445	280	105	-296.15	0.00352	95	60	-290.084	0.07745	250	105	-301.699	0.15937
F1N1C7	240	120	-428.568	0.0333	240	120	-397.678	0.02299	240	120	-401.22	0.02517
A5D7Q6	285	75	-223.92	0.10983	285	75	-216.852	0.09259	285	75	-220.447	0.11824
Q58CQ9	210	95	-257.038	0.08809	210	95	-274.815	0.08219	210	95	-253.891	0.07923
A6QP32	70	45	-255.842	0.0148	320	165	-258.025	0.02575	315	165	-252.492	0.01593
F1MDD8	65	140	-304.629	0.0459	65	140	-300.485	0.04785	140	20	-300.66	0.0643
P63103	110	150	-255.36	0.18135	110	150	-261.705	0.1653	110	150	-251.561	0.16793
A4IFP2	165	115	-306.88	0.07195	350	70	-309.474	0.04097	210	135	-303.603	0.09916
Q2KIU3	340	115	-264.593	0.06088	340	115	-242.944	0.04403	335	145	-242.914	0.02804
P02676	90	115	-262.572	0.05073	160	35	-251.145	0.06632	90	115	-247.506	0.04767
P80311	260	60	-228.751	0.19316	275	45	-208.755	0.00875	260	65	-215.436	0.17652
F1MX87	60	35	-286.812	0.06969	60	35	-298.328	0.0595	60	35	-294.854	0.08097
F1MUY2	230	155	-300.461	0.07476	230	155	-296.418	0.0632	230	155	-302.315	0.07461
A6QQD5	310	85	-340.854	0.02183	310	85	-317.039	0.01722	310	85	-308.399	0.0296
F1MB08	120	85	-241.194	0.07901	120	85	-253.441	0.07476	120	85	-257.527	0.08338
F1N4M7	160	100	-303.428	0.14093	160	100	-304.118	0.12586	160	100	-280.645	0.13252
Q3ZC07	315	145	-276.579	0.04947	315	145	-272.948	0.05155	315	145	-251.762	0.05116
G3X745	130	145	-399.762	0.06039	130	145	-376.385	0.06492	130	145	-385.413	0.0706
F1MWU9	310	120	-301.397	0.05042	310	120	-286.223	0.04113	315	120	-293.828	0.08464
Q0P5J6	125	125	-254.762	0.12717	125	125	-258.027	0.12093	125	125	-263.986	0.12956
Q27960	75	65	-243.828	0.0691	10	115	-244.765	0.14931	10	115	-264.805	0.14056
Q5E984	340	85	-228.559	0.08592	340	85	-221.293	0.07638	340	85	-211.641	0.07531
Q1RMJ6	145	95	-233.976	0.12375	145	95	-224.295	0.12362	145	95	-229.321	0.11901
Q2KJJ8	285	135	-324.61	0.0363	280	135	-315.576	0.02	285	135	-302.674	0.03727
P26779	190	100	-252.41	0.13662	150	130	-261.33	0.04926	190	100	-258.72	0.12472
F1MS40	65	95	-290.074	0.03822	65	95	-290.369	0.0433	65	95	-271.169	0.0348
F1MR63	350	115	-280.024	0.10042	355	115	-270.775	0.10925	355	115	-278.015	0.12631
A4FV54	340	80	-195.962	0.11121	340	100	-188.58	0.16683	345	100	-202.188	0.14157
P79136	340	150	-256.649	0.12341	340	150	-271.966	0.11387	340	155	-262.3	0.14325
Q3T0L5	130	50	-204.685	0.11757	130	50	-215.006	0.10308	130	50	-207.516	0.12246
A5PJJ1	180	70	-211.479	0.02825	180	70	-203.14	0.02079	180	70	-215.08	0.02859
E1BEZ9	35	55	-277.177	0.02969	35	55	-249.843	0.0214	35	55	-259.508	0.02688
E1B8A0	345	145	-246.058	0.0096	355	150	-237.267	0.06693	345	145	-240.598	0.0066
Q9XSC9	210	135	-295.002	0.0103	210	135	-271.96	0.01098	200	140	-295.864	0.04522
Q2KIX7	280	75	-264.799	0.04764	280	75	-233.725	0.04467	280	75	-253.735	0.03902
E1BNJ9	160	145	-277.591	0.0326	285	115	-251.647	0.14913	160	145	-289.663	0.027
E1B9F6	255	40	-267.334	0.10983	255	40	-267.545	0.12687	255	40	-266.911	0.09932
A6QLZ7	230	30	-292.345	0.09776	260	80	-276.638	0.09916	260	80	-288.636	0.09164
P13753	55	50	-285.931	0.11656	60	50	-280.953	0.08938	60	50	-274.152	0.08363
Q2KJE7	80	115	-347.106	0.12586	55	100	-354.685	0.11179	55	100	-330.404	0.11002
F1MEP6	300	130	-233.167	0.14292	300	130	-219.288	0.14041	300	130	-230.667	0.1379
P02081	210	110	-237.775	0.0122	210	110	-225.241	0.01514	215	115	-243.856	0.01119
Q3SZ62	235	135	-259.155	0.05455	235	135	-231.433	0.05033	240	140	-251.904	0.04477
E1BQ21	295	120	-222.169	0.14448	0	30	-203.629	0.17564	295	120	-217.131	0.15185
E1BDY3	140	155	-406.947	0.01691	140	155	-369.918	0.00923	140	155	-389.96	0.02119
Q3SZH5	215	125	-301.58	0.01	320	25	-277.254	0.12448	215	125	-268.627	0.00963
P24627	205	80	-353.452	0.14341	205	80	-323.31	0.14133	205	80	-353.394	0.13839
A7YWH4	35	45	-231.95	0.10742	30	45	-227.058	0.09412	325	25	-230.619	0.09849
A7YWK3	185	110	-275.275	0.02926	20	35	-292.189	0.03446	20	35	-284.671	0.04596
Q6R8F2	70	65	-183.361	0.02116	70	65	-171.558	0.02666	70	65	-167.65	0.02798
Q3ZC35	155	25	-178.601	0.01131	155	25	-188.232	0.0026	155	25	-176.978	0.00673
P23805	130	105	-266.518	0.01034	260	105	-246.724	0.11445	130	105	-244.82	0.00875
F1MWX8	80	10	-271.256	0.04865	80	10	-267.124	0.04226	80	10	-271.102	0.0366
F1N045	250	50	-243.213	0.09485	250	50	-241.89	0.08635	250	50	-237.073	0.08828
Q2NKZ9	340	110	-262.154	0.11231	220	110	-259.035	0.15989	355	90	-255.895	0.12427
P13696	205	20	-227.783	0.13151	205	20	-230.715	0.12479	205	20	-229.688	0.11638
P21856	85	60	-286.384	0.00385	85	60	-279.506	0.00813	315	115	-275.521	0.11687
Q32L50	90	135	-248.511	0.08803	90	130	-259.71	0.05987	90	135	-284.841	0.08675
Q2NKV1	100	95	-244.686	0.14163	90	95	-232.572	0.16545	90	95	-247.81	0.17139
A6QPQ2	0	0	-0.00205	2	0	0	-0.00205	2	0	0	-0.00205	2
G3X6N3	130	70	-282.311	0.02437	130	70	-269.738	0.02306	130	70	-258.883	0.0292
Q9TUM6	10	55	-253.897	0.01758	10	55	-262.193	0.01804	10	55	-236.666	0.02495
Q1RMU3	95	115	-230.944	0.09228	95	115	-229.077	0.0792	95	115	-230.851	0.06684
A6QR28	165	105	-298.577	0.08693	165	105	-311.959	0.07773	165	105	-290.226	0.07277
A4IFP7	10	120	-240.268	0.03978	10	120	-232.38	0.03119	10	120	-239.917	0.02715
E1BLC2	180	30	-187.339	0.03639	180	30	-188.825	0.02679	180	30	-196.194	0.03532
A6QPT7	345	35	-304.7	0.0207	345	35	-306.96	0.01825	345	35	-281.371	0.02966
F1MHQ8	85	45	-299.787	0.02584	85	45	-297.679	0.02859	85	45	-282.251	0.04125
P28801	60	55	-236.071	0.15619	65	55	-246.148	0.15023	65	55	-241.824	0.14974
A5D9E9	165	120	-332.904	0.03394	165	120	-332.91	0.0207	165	120	-340.642	0.03394
F1MU18	180	120	-266.459	0.10292	180	120	-250.711	0.08822	180	115	-264.058	0.08057
F1MLR4	260	140	-242.287	0.04596	160	35	-257.812	0.047	260	140	-234.401	0.05054
P63258	160	65	-248.251	0.12616	160	65	-244.507	0.1328	160	65	-235.327	0.11586
A6QPZ4	110	125	-254.073	0.13219	110	125	-243.912	0.13001	110	125	-237.621	0.15145
F1MSA1	255	120	-264.139	0.18386	275	125	-245.151	0.17735	275	125	-252.999	0.17701
G3N188	275	95	-227.933	0.11904	270	95	-229.946	0.04339	275	95	-219.815	0.11794
F1N430	260	95	-212.507	0.08222	260	95	-201.348	0.08815	80	90	-191.192	0.14952
F1N1N6	325	90	-277.258	0.08247	325	90	-273.921	0.08932	325	90	-280.846	0.07733
P56652	50	70	-313.184	0.0917	50	70	-294.7	0.09393	50	70	-282.342	0.08913
G3N2B8	115	15	-196.899	0.12925	115	20	-211.638	0.1805	115	20	-216.901	0.18915
P05689	15	170	-298.811	0.05917	20	170	-294.8	0.06375	5	170	-303.249	0.05709
E1BE76	345	150	-313.803	0.02923	345	150	-298.818	0.04131	350	150	-312.118	0.06094
Q148H8	40	120	-228.484	0.10011	245	155	-246.015	0.1343	240	155	-238.936	0.14344
Q27965	200	90	-296.59	0.00936	205	90	-275.334	0.03535	200	90	-276.253	0.02501
F1MKM4	0	85	-299.919	0.05097	0	85	-312.147	0.04791	5	85	-326.366	0.051
G8JKV7	335	5	-269.504	0.02217	335	5	-263.27	0.01657	330	5	-257.236	0.01082
P26201	250	155	-357.684	0.00682	255	160	-345.725	0.12289	255	160	-344.165	0.08803
F1MNT5	250	105	-203.591	0.01972	250	100	-209.109	0.00269	250	95	-218.494	0.01709
P25975	95	40	-238.328	0.17567	95	40	-246.271	0.17136	95	40	-239.164	0.17074
F1MW79	245	120	-270.904	0.10849	245	120	-287.956	0.08904	245	120	-270.869	0.09565
G5E5C8	25	165	-307.704	0.08525	30	165	-303.198	0.09372	5	160	-307.513	0.11671
Q9TU03	150	75	-260.368	0.15729	155	75	-254.899	0.14246	155	75	-246.97	0.14298
Q2KJ53	245	85	-231.969	0.1416	245	85	-235.429	0.1206	245	85	-223.588	0.13726
Q0VC36	220	15	-283.618	0.13537	220	15	-296.245	0.11136	220	15	-294.957	0.12188
Q2KJ64	145	130	-280.658	0.07987	5	80	-277.332	0.02165	190	115	-267.526	0.17282
F1MUT3	325	110	-374.373	0.10445	325	110	-370.562	0.10259	325	110	-379.61	0.08776
Q9MZ06	35	125	-254.052	0.16591	35	125	-245.887	0.15209	35	125	-246.339	0.15576
F1MJK3	40	120	-371.691	0.02948	40	120	-360.841	0.02342	40	120	-350.782	0.02547
F1N780	250	125	-239.582	0.05666	250	125	-232.252	0.05213	250	125	-244.206	0.04174
Q5EAB4	50	105	-272.372	0.0596	50	105	-272.644	0.04568	50	105	-272.629	0.05042
F2Z4F5	255	55	-334.327	0.07076	255	55	-325.263	0.0551	255	55	-316.832	0.07039
F1MU22	210	130	-353.123	0.0699	210	130	-343.881	0.06128	210	130	-336.636	0.06403
P55052	35	80	-187.246	0.18374	30	80	-199.92	0.16824	30	80	-189.818	0.17658
P13384	265	150	-245.732	0.02682	265	150	-242.104	0.01593	265	150	-257.07	0.01673
A5D7R9	265	85	-226.42	0.081	265	85	-236.83	0.07926	265	90	-222.475	0.12928
Q0VD27	185	145	-280.473	0.03296	185	145	-263.003	0.02715	185	145	-273.391	0.02088
Q8MI01	60	20	-218.484	0.02354	60	20	-219.643	0.01654	60	20	-223.24	0.02131
Q95121	100	145	-312.964	0.01801	90	140	-306.249	0.15206	90	140	-301.243	0.14925
Q3ZBY4	215	60	-308.17	0.03519	215	60	-298.975	0.03235	215	60	-299.528	0.03501
Q95116	295	125	-296.171	0.06687	295	120	-296.62	0.10332	300	130	-280.607	0.1501
H9GW43	0	95	-270.6	0.17502	0	95	-273.707	0.15368	0	95	-282.8	0.14038
E1BPC9	280	110	-305.825	0.01165	285	115	-280.126	0.01743	280	110	-285.354	0.01483
G3N0V0	210	35	-282.808	0.15922	220	15	-263.417	0.12148	210	35	-265.492	0.1557
F1MR22	50	115	-248.628	0.07586	50	115	-265.843	0.05874	50	115	-245.394	0.06027
P80025	225	25	-299.21	0.01455	225	25	-276.671	0.00774	225	25	-297.522	0.00875
E1BJN3	285	80	-344.899	0.09916	105	60	-333.292	0.0924	285	80	-347.179	0.07757
Q863B3	145	40	-325.127	0.0769	145	40	-311.53	0.07118	145	40	-313.998	0.06929
F1N2J9	335	80	-188.713	0.15967	220	170	-176.385	0.16619	340	80	-185.39	0.16441
P68138	10	125	-262.911	0.04235	200	60	-248.476	0.0954	10	125	-246.073	0.04116
A6QP90	275	55	-302.822	0.02	275	55	-329.325	0.00771	280	50	-300.137	0.03871
Q0V7N2	35	50	-351.455	0.05657	35	45	-346.314	0.04024	35	50	-355.331	0.05024
A6H713	80	90	-326.403	0.13637	80	90	-290.709	0.12769	80	90	-303.604	0.13478
Q3SYU8	150	155	-252.902	0.07886	150	155	-270.048	0.07418	150	155	-246.92	0.07999
E1B898	20	65	-310.603	0.0307	20	65	-372.113	0.00878	20	65	-308.3	0.03678
P01888	235	120	-222.693	0.02113	235	120	-215.135	0.02293	85	15	-218.698	0.18175
P62833	345	45	-221.989	0.13497	170	70	-217.32	0.108	345	45	-212.402	0.11693
A5D7E8	35	140	-319.006	0.00673	35	140	-307.24	0.00459	35	140	-285.149	0.01403
E1B748	340	95	-430.912	0.04293	340	95	-401.439	0.03764	340	95	-421.402	0.04177
O62830	250	50	-265.144	0.05993	180	140	-271.441	0.0629	180	140	-262.434	0.07146
Q8MJ16	165	150	-159.38	0.0207	340	70	-159.033	0.02046	355	110	-158.099	0.02364
F1N0F2	285	155	-251.613	0.16622	165	5	-244.909	0.08754	265	10	-250.641	0.01752
A6QL75	210	105	-231.285	0.13142	210	105	-221.853	0.11748	210	105	-241.122	0.11277
E1BC58	55	25	-196.367	0.17325	55	25	-183.014	0.15799	55	25	-207.028	0.15295
P02662	60	45	-431.529	0.10121	60	45	-410.474	0.09806	60	45	-398.422	0.10571
Q5E9Z9	205	155	-182.957	0.00263	205	155	-186.59	0.00449	205	155	-186.354	0.01156
F1MD95	15	130	-136.078	0.10253	340	155	-116.776	0.00896	15	130	-138.562	0.09188
F1MLU7	30	25	-227.137	0.02235	30	25	-244.214	0.01437	105	145	-249.821	0.04122
Q29443	60	120	-297.776	0.13032	60	120	-292.757	0.12998	60	120	-274.556	0.11925
F1MKS5	220	40	-212.767	0.04321	220	40	-198.345	0.03489	220	40	-202.486	0.04492
F1MJ66	290	55	-310.556	0.03639	290	55	-308.717	0.02345	155	125	-310.125	0.10876
Q148H5	175	100	-285.487	0.01339	220	150	-281.107	0.05165	175	100	-282.322	0.00832
Q08DL0	250	80	-299.29	0.07702	250	80	-288.157	0.06433	250	80	-293.495	0.07907
Q03763	105	70	-184.496	0.00379	185	130	-187.246	0.08629	180	130	-181.714	0.12641
Q3B7M9	250	85	-322.804	0.01306	310	170	-301.719	0	290	140	-310.198	0.061
Q2T9S4	55	20	-244.44	0.16961	55	25	-238.017	0.08412	55	20	-243.096	0.16359
E1BJL8	220	80	-268.904	0.10127	220	80	-280.028	0.09207	60	100	-268.885	0.14081
E1BFG1	355	115	-280.149	0.02645	355	115	-314.234	0.01061	355	115	-292.857	0.04406
Q0II48	190	165	-264.608	0.18316	190	165	-252.482	0.16906	195	165	-275.049	0.17707
P34955	85	130	-270.926	0.07623	85	130	-270.584	0.06311	85	130	-263.384	0.05574
G3N0X3	350	80	-337.512	0.12949	350	80	-319.965	0.1073	350	80	-344.17	0.1147
F1MXJ5	120	90	-149.13	0.00015	120	90	-140.794	0	120	90	-138.171	0.00511
F1N529	115	115	-270.296	0.09626	115	115	-263.843	0.0884	115	115	-270.228	0.08556
P10096	0	115	-259.499	0.17368	0	115	-258.585	0.16114	305	35	-262.38	0.0714
F1N036	135	40	-358.889	0.01777	135	40	-361.583	0.00911	135	40	-353.104	0.01413
A0JND2	175	90	-248.693	0.00914	175	90	-270.53	0.00318	175	90	-266.282	0.00446
G3N2D7	220	25	-212.339	0.16729	220	25	-228.589	0.1627	220	25	-197.054	0.17123
Q3T145	305	115	-222.498	0.18343	120	135	-215.224	0.1424	120	140	-207.123	0.17652
