# Supplementary material for: Multiscale Modelling of Milk Proteins Adsorption on Metallic Iron Surfaces
Source: Preprints.org preprint supplement (doi:10.20944/preprints202305.1711.v1), 2023-05-24
Supplement: Supplementary file 2 [file supplementary]

Archive with 2 entries (2 files):
- 820-milk-proteins.xlsx
- supporting-material.pdf
